# Supplementary material for: Gene Expression Patterns in the Human Breast after Pregnancy
Source: Oxford University Press journal article supplement (doi:10.1158/1940-6207.capr-09-0069), 2010-02-23
Supplement: 19406207capr090069-sup-stab_3.xls [file 19406207capr090069-sup-stab_3.xls]

## Sheet: 1
Please read notes by clicking on cell A3!!!
av = average gene expression				NP = nulliparous
SD = standard deviation				P = parous
	av NP	av P	SD NP	SD P	p value
B2M	1	1.38822	0.402706	0.358984	0.000210811
CCL21	1	2.66774	1.37824	2.48809	0.000263872
LBP	1	4.11279	0.680325	2.78089	0.00241055
ESR2	1	2.01586	0.476411	1.55726	0.00279207
CDH1	1	0.687522	0.489071	0.487293	0.00352327
SAA1+SAA2	1	1.41789	0.630008	0.607477	0.00366247
IGKC	1	1.91464	0.688879	1.10524	0.0059773
ESR1	1	0.511182	0.894315	0.394438	0.00618092
IGHD	1	0.525059	1.35665	0.823351	0.00662948
PGR	1	0.634767	0.842102	0.66053	0.0136378
ERBB2	1	0.762794	0.438691	0.28409	0.0160547
ANGPT1	1	1.50258	0.653292	1.12589	0.0327695
TIMP2	1	1.26695	0.594898	0.585248	0.0354475
VEGFA	1	0.725061	0.673985	0.296614	0.0358674
COL1A1	1	0.770838	0.606857	0.869077	0.0512021
TGFB3	1	0.799311	0.441118	0.414937	0.0565256
MMP9	1	0.519987	1.30345	1.05532	0.0674702
MMP14	1	0.77798	0.501446	0.355963	0.0881224
IL1A	1	4.84358	0.296205	7.00593	0.101082
IL10	1	0.766575	0.510209	0.73353	0.114072
CD14	1	1.21899	0.634781	0.749335	0.157185
MMP10	1	0.797741	1.29555	0.695243	0.170836
CXCL9	1	1.24905	0.857385	1.58878	0.199661
IFNG	1	1.32954	0.821733	0.977742	0.212061
ADAM9	1	1.16933	0.370741	0.475395	0.217201
TGFB1	1	1.17357	0.517769	0.516115	0.217837
IL11	1	0.689757	1.06228	0.502567	0.225657
GAPDH	1	0.824499	0.54677	0.578041	0.242979
PRKCA	1	0.0193018	3.94096	0.00612698	0.252088
THBS1	1	0.810724	0.66082	0.346382	0.298131
IGHM	1	0.652952	1.61342	0.852585	0.298279
CD68	1	1.07463	0.571516	0.380706	0.303444
FN1	1	1.1792	0.620627	0.71415	0.321151
STAT3	1	1.10381	0.383299	0.398338	0.323959
IGHA1	1	1.13741	0.987565	1.05192	0.336797
ELN	1	1.13223	0.694765	0.618844	0.358997
TNC	1	1.01358	0.931788	1.17708	0.378509
PTGS2	1	1.44014	0.678345	1.30505	0.447644
ACTB	1	0.953523	0.208975	0.148953	0.483659
HPRT1	1	1.02314	0.239713	0.150459	0.483659
CXCL1	1	0.952599	0.508153	0.593467	0.583808
IL6	1	1.90062	1.08923	5.08741	0.588466
CCL8	1	0.940957	0.662848	0.599511	0.627044
CXCR4	1	0.799551	0.847703	0.498618	0.637145
ADAM10	1	0.893097	0.57206	0.370189	0.652351
TNF	1	1.01211	0.775419	1.04223	0.655596
PDGFA	1	0.947761	0.419292	0.417909	0.698158
IGHG1	1	1.00543	0.934526	0.806662	0.711628
MMP1	1	0.992386	0.781814	1.05459	0.723427
MMP15	1	1.02092	0.468223	0.441762	0.724506
NFKB1	1	0.946181	0.421217	0.331062	0.73835
MMP12	1	2.26439	0.777035	5.09945	0.787131
IL1B	1	1.2129	0.955801	1.37878	0.830504
FBN1	1	0.931946	0.588727	0.476054	0.861754
MMP3	1	1.39327	1.63263	2.68445	0.864489
CCL7	1	1.33327	0.536315	1.06334	0.907775
IL8	1	0.922149	1.07743	1.09614	0.931712
MMP2	1	0.997893	0.68919	0.707682	0.951218
CTNNB1	1	0.938517	0.456306	0.289788	0.976332
CXCL12	1	0.848231	0.751816	0.360446	0.997122
